# Supplementary material
Source: Springer Nature journal article supplement (https://www.springermedizin.de/resource/supplementary/12891_2012_1729_MOESM4_ESM.pdf/9508412)

# Ulnar Length Norms and RLD Children

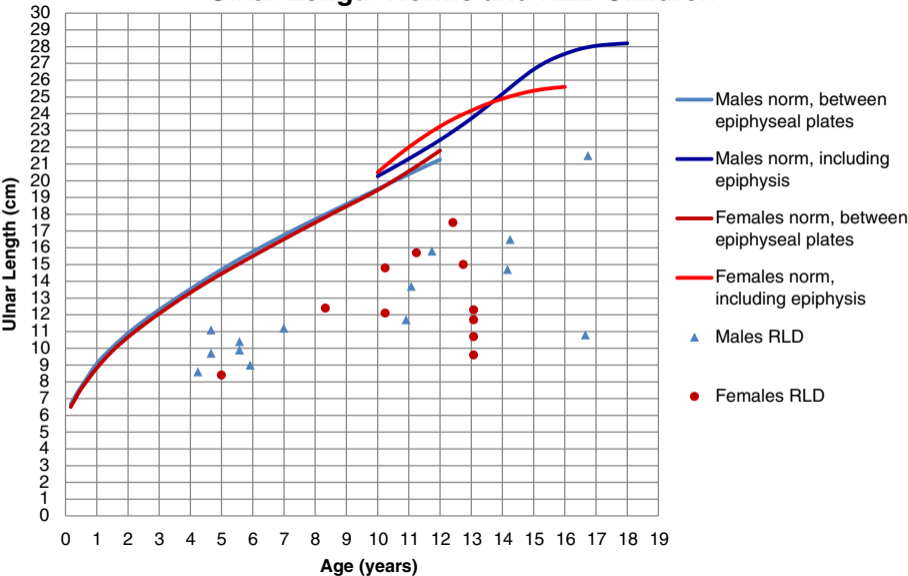

Supplement: MOESM4 [file 9508412]
